# Supplementary material for: Controlling interpenetration in metal–organic frameworks by tuning the conformations of flexible bis(triazole) ligands
Source: Royal Society of Chemistry journal article supplement (doi:10.1039/c3ce40445e), 2013-01-01
Supplement: c3ce40445e.pdf [file c3ce40445e.pdf]

## Controlling Interpenetration in Metal-Organic Frameworks by Tuning the Conformations of Flexible Bis(triazole) Ligands

Xiang He,<sup>ab\*</sup> Xiao-Peng Lu,<sup>a</sup> Yu-Yang Tian,<sup>b</sup> Ming-Xing Li<sup>a</sup> and Russell E. Morris<sup>b</sup>

<sup>a</sup> Department of Chemistry, College of Sciences, Shanghai University, Shanghai, China, 200444.

<sup>b</sup> School of Chemistry, University of St Andrews, North Haugh, St Andrews, Fife, Scotland, UK KY16 9QT.

\*Corresponding author. E-mail: X He: [hexiang23@gmail.com](mailto:hexiang23@gmail.com)

**Table S1.** Selected bond distances (Å) and angles (°) for compounds **1-2**

| Compound 1   |          |                   |            |                     |            |
|--------------|----------|-------------------|------------|---------------------|------------|
| N(1)-Zn(1)   | 2.057(4) | O(2)-Zn(1)-N(1)   | 114.57(13) | O(2)-Zn(1)-O(7)     | 84.00(14)  |
| O(2)-Zn(1)   | 1.967(3) | O(2)-Zn(1)-O(3)#4 | 148.32(12) | N(1)-Zn(1)-O(7)     | 85.74(15)  |
| O(3)-Zn(1)#1 | 2.106(3) | N(1)-Zn(1)-O(3)#4 | 96.40(13)  | O(3)#4-Zn(1)-O(7)   | 92.25(13)  |
| O(6)-Zn(1)   | 2.128(3) | O(2)-Zn(1)-O(6)   | 95.73(13)  | O(6)-Zn(1)-O(7)     | 179.59(14) |
| O(7)-Zn(1)   | 2.230(3) | N(1)-Zn(1)-O(6)   | 94.66(14)  | O(3)#4-Zn(1)-O(6)   | 87.82(13)  |
| Compound 2   |          |                   |            |                     |            |
| N(1)-Zn(1)#1 | 2.020(6) | Zn(1)-O(4)#3      | 1.990(4)   | O(4)#3-Zn(1)-N(1)#1 | 104.8(2)   |
| N(4)-Zn(1)   | 2.017(6) | Zn(1)-N(1)#1      | 2.020(6)   | O(1)-Zn(1)-N(1)#1   | 105.1(2)   |
| O(1)-Zn(1)   | 1.986(4) | O(4)#3-Zn(1)-O(1) | 96.83(18)  | N(4)-Zn(1)-N(1)#1   | 118.0(2)   |
| O(4)-Zn(1)#2 | 1.990(4) | O(1)-Zn(1)-N(4)   | 114.1(2)   | O(4)#3-Zn(1)-N(4)   | 115.4(2)   |

Symmetry transformations used to generate equivalent atoms: #1  $x, y-1, z$ , #2  $-x-1/2, -y+3/2, -z$ , #3  $-x+1, -y+3, -z+1$ , #4  $x, y+1, z$  for **1**; #1  $-x+2, -y+2, -z$ , #2  $x-1, y, z$ , #3  $x+1, y, z$ , #4  $-x, -y, -z$  for **2**;

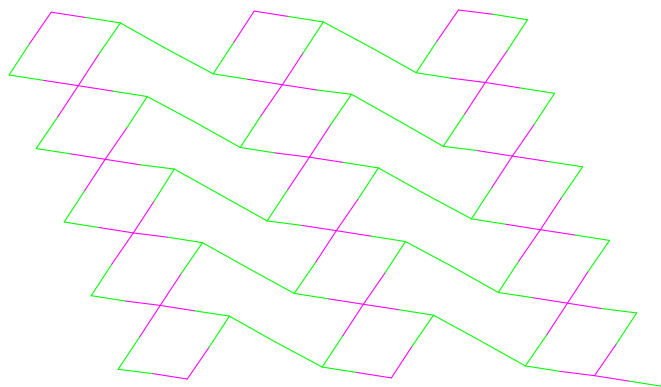

**Fig. S1** New (3,4)-connected 2-nodal topologic structure of **1** with a  $(4.6^2)_2(4^2.6^2.8^2)$  network in the Schläfli notation. (green for 3-connected node and purple for 4-connected node)

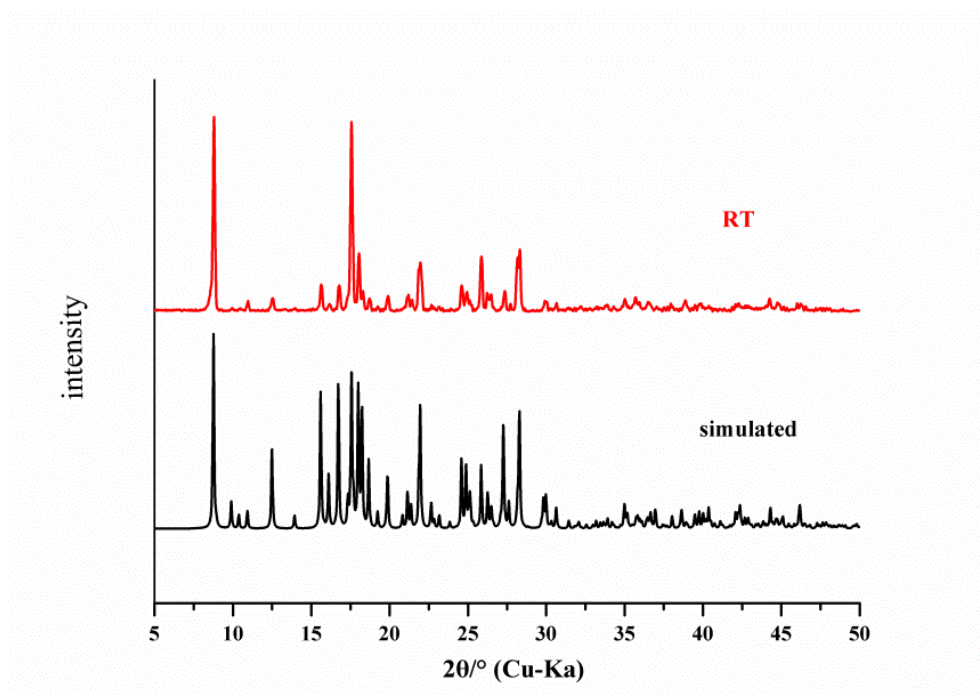

Compound 1

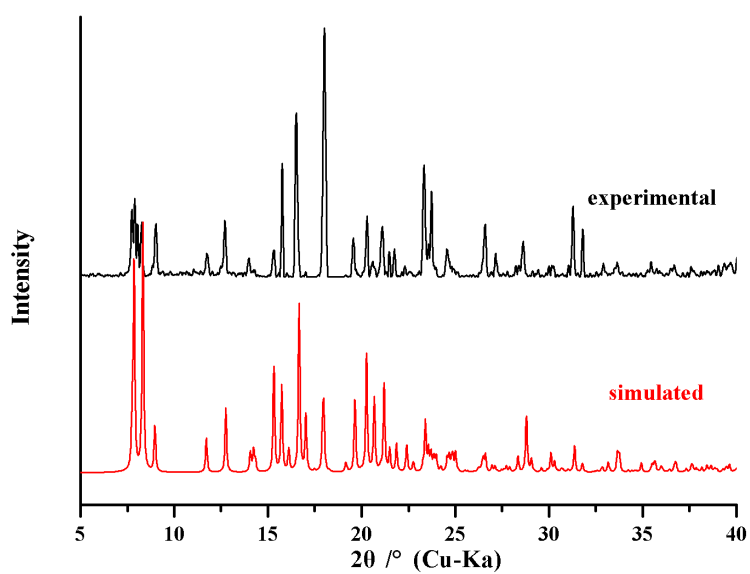

Compound 2

**Fig S2** Powder X-ray diffractions (PXRD) for complexes 1-2.

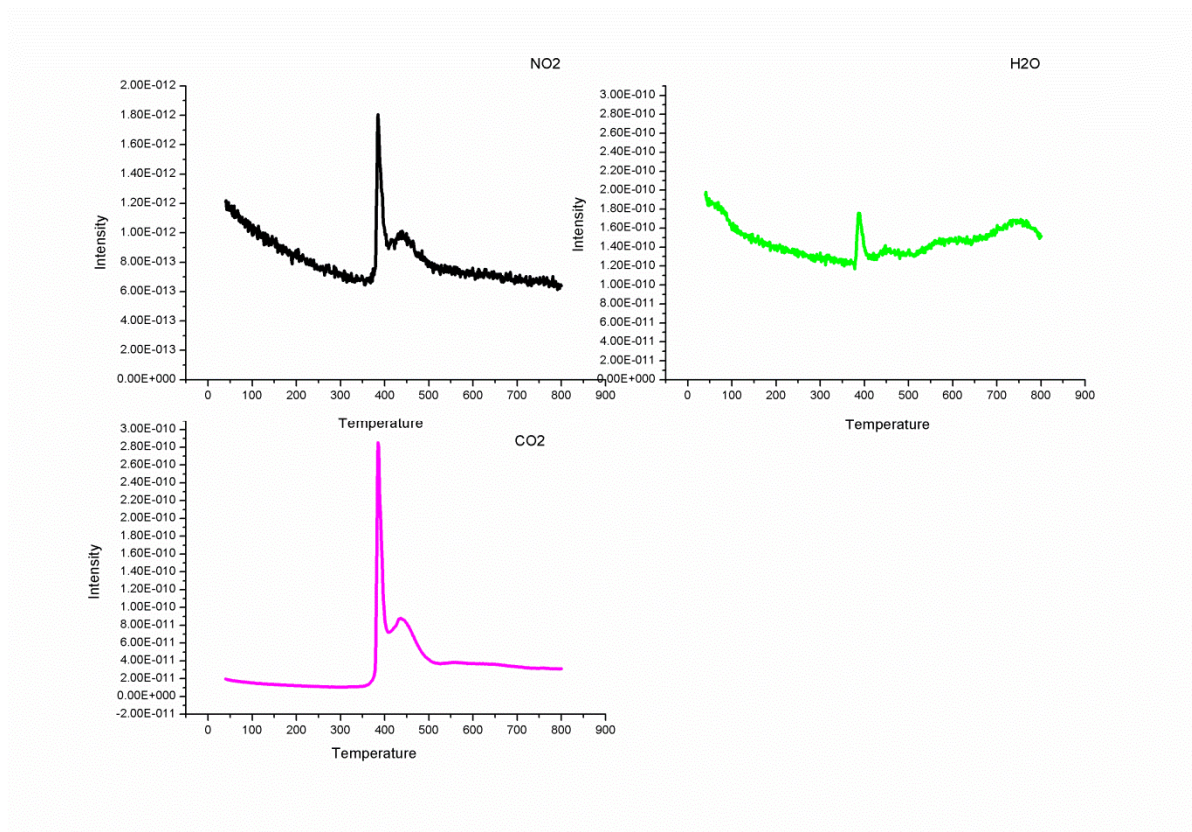

**Fig S3** MS curves of the decomposed products for **2**.

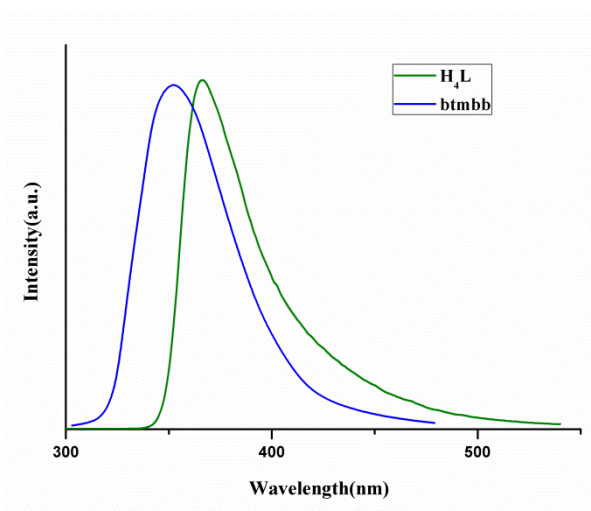

**Fig. S4** Solid-state emission spectra of the free ligands btmbb and H<sub>4</sub>L<sub>1</sub> at room temperature.
